# Supplementary material for: New routes to poly(4,4-dialkylcyclopentadithiophene-2,6-diyls)Electronic supplementary information (ESI) available: partial MALDI-TOF mass spectrum of polymer 5. See http://www.rsc.org/suppdata/jm/b2/b206477d/
Source: Royal Society of Chemistry journal article supplement (doi:10.1039/b206477d), 2002-07-29
Supplement: b206477d.doc [file b206477d.doc]

# Supplementary Material for B206477D

**Figure 1**: Partial MALDI-TOF mass spectrum of polymer **5** showing peak associated with trimer of [4,4-dioctylcyclopentathiophene]. Peaks can be assigned to trimers with 2H end groups (1205), 1H and 1Me end group (1220), 2Me end groups (1235), 1Cl and 1Me end group (1250), unknown (1264), 1Br and 1H end group (1284), 1Br and 1Me end group (1296) and 2Br end groups (1365).
